# Supplementary material
Source: Springer Nature journal article supplement (https://www.springermedizin.de/resource/supplementary/12906_2009_296_MOESM5_ESM.pdf/9519354)

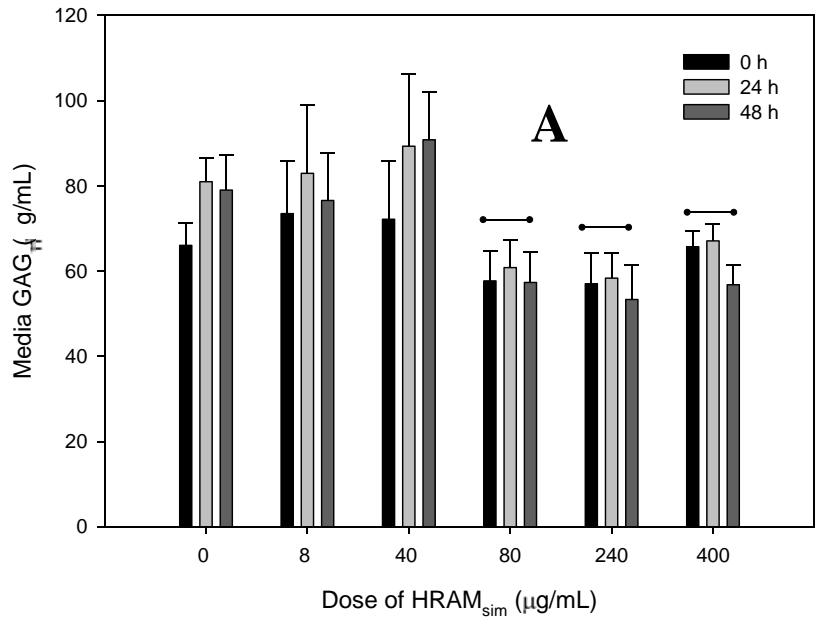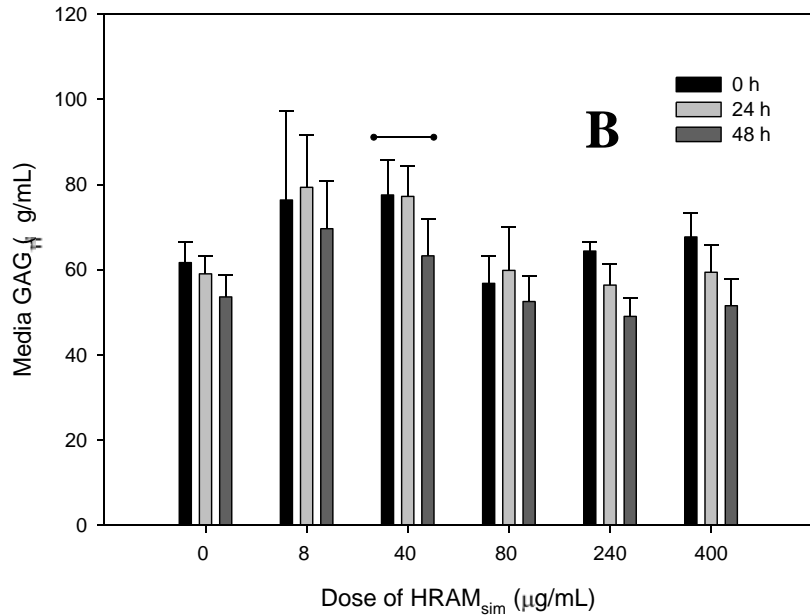

Supplement: MOESM5 [file 9519354]
